# Supplementary material for: Dynamic localization of the chromosomal passenger complex in trypanosomes is controlled by the orphan kinesins KIN-A and KIN-B
Source: eLife journal article supplement (doi:10.7554/elife.93522), 2024-01-08
Supplement: fig2-figsupp1-data2 [file elife-93522-fig2-figsupp1-data2-v1.zip]

Other experiments (not used for this study)

Control  
*KIN-A RNAi*  
Control  
*KIN-B RNAi*

anti-GFP

kDa  
100  
75

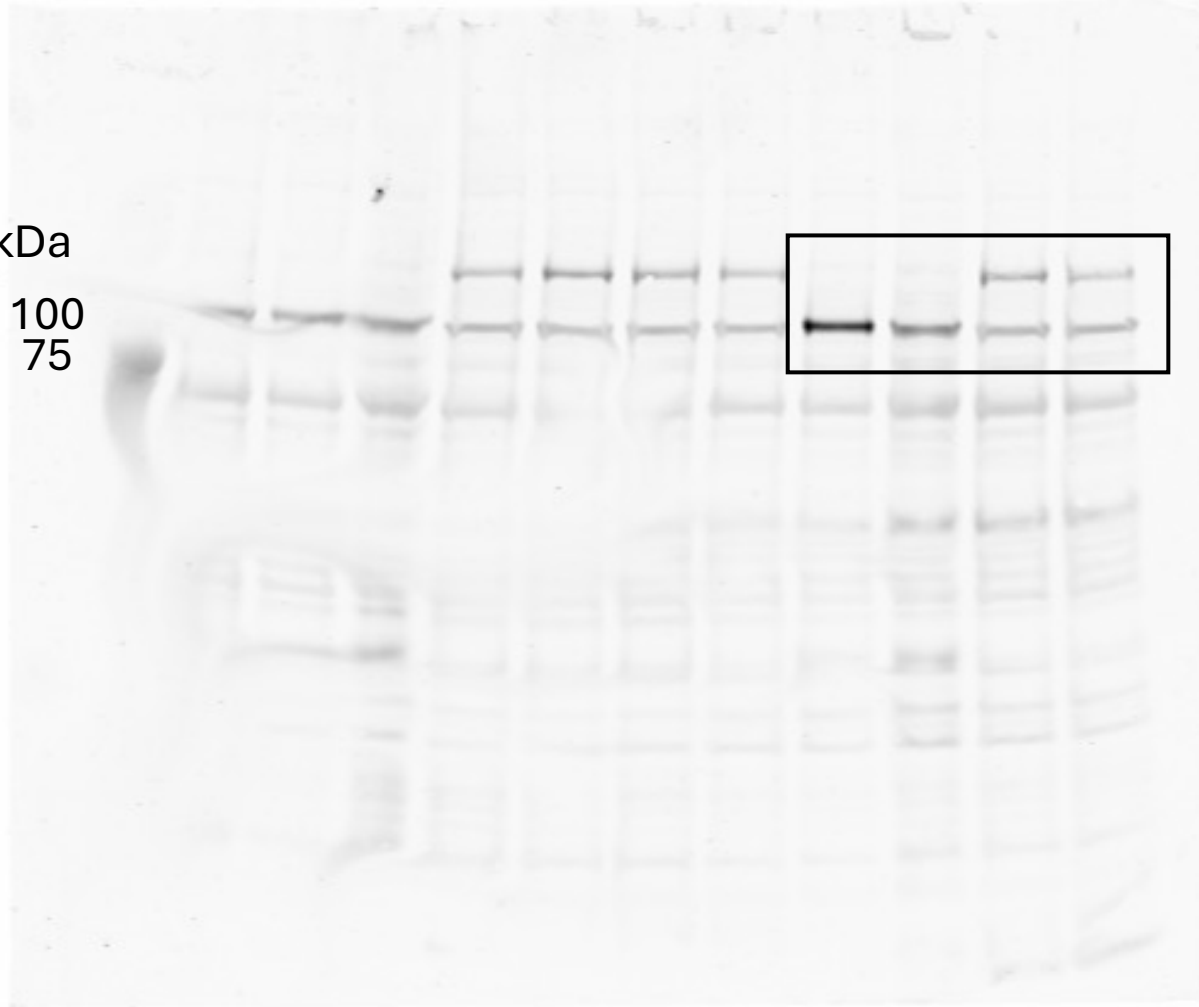

KIN-A-YFP  
YFP-KIN-B

Other experiments (not used for this study)

Control  
*KIN-A RNAi*  
Control  
*KIN-B RNAi*

anti-tubulin

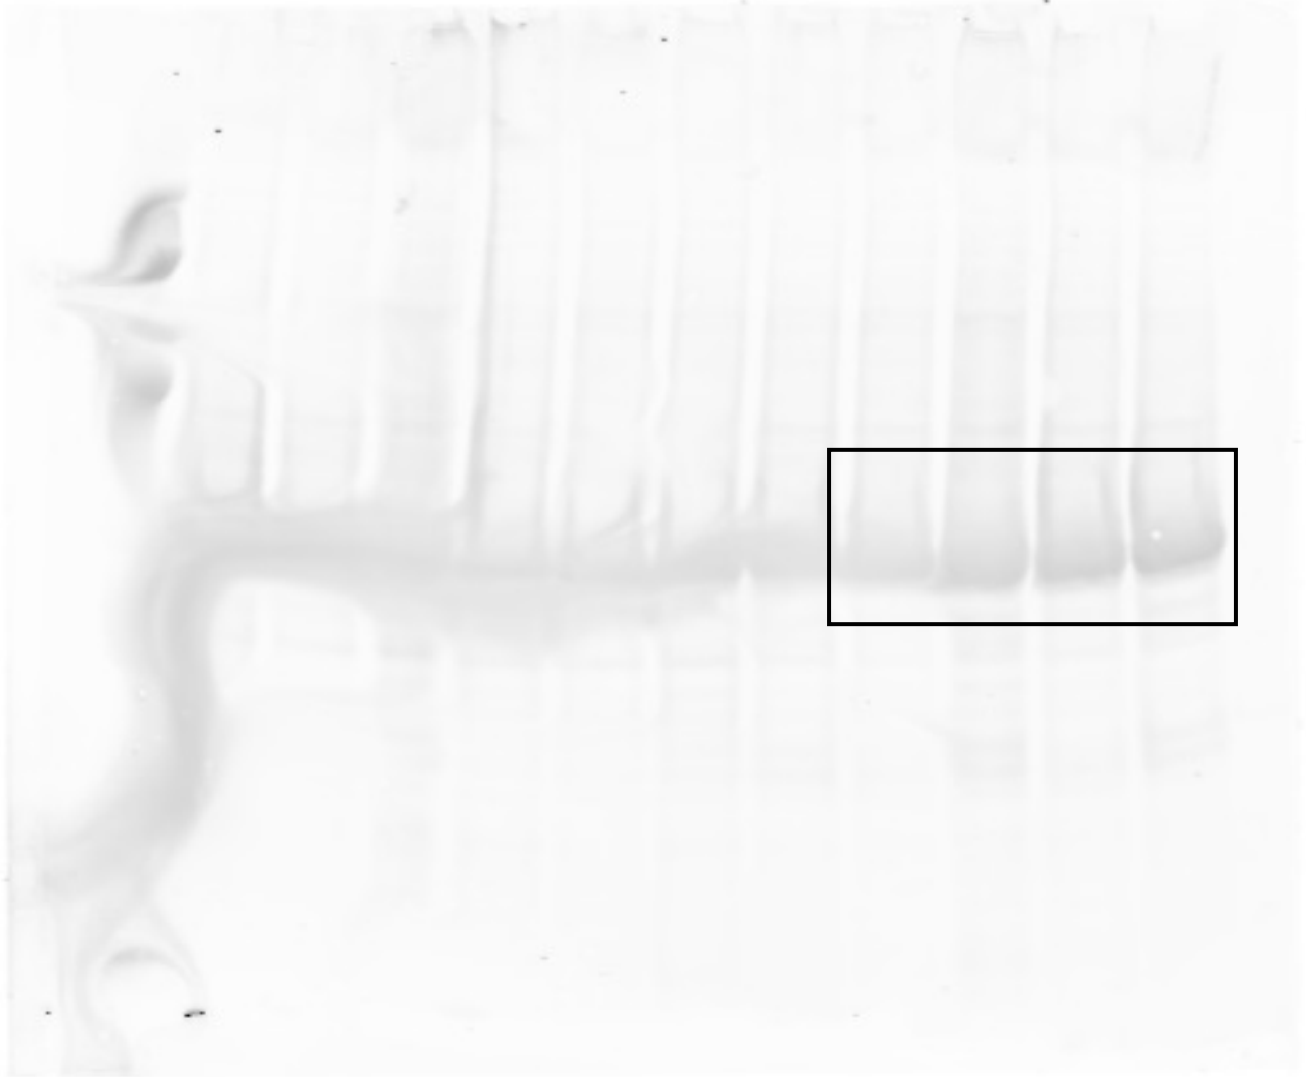

alpha-tubulin
