# Supplementary figures and images for: Dynamic localization of the chromosomal passenger complex in trypanosomes is controlled by the orphan kinesins KIN-A and KIN-B
Source: eLife journal article supplement (doi:10.7554/elife.93522), 2024-01-08

plasmids transformed  
into *E. coli*:

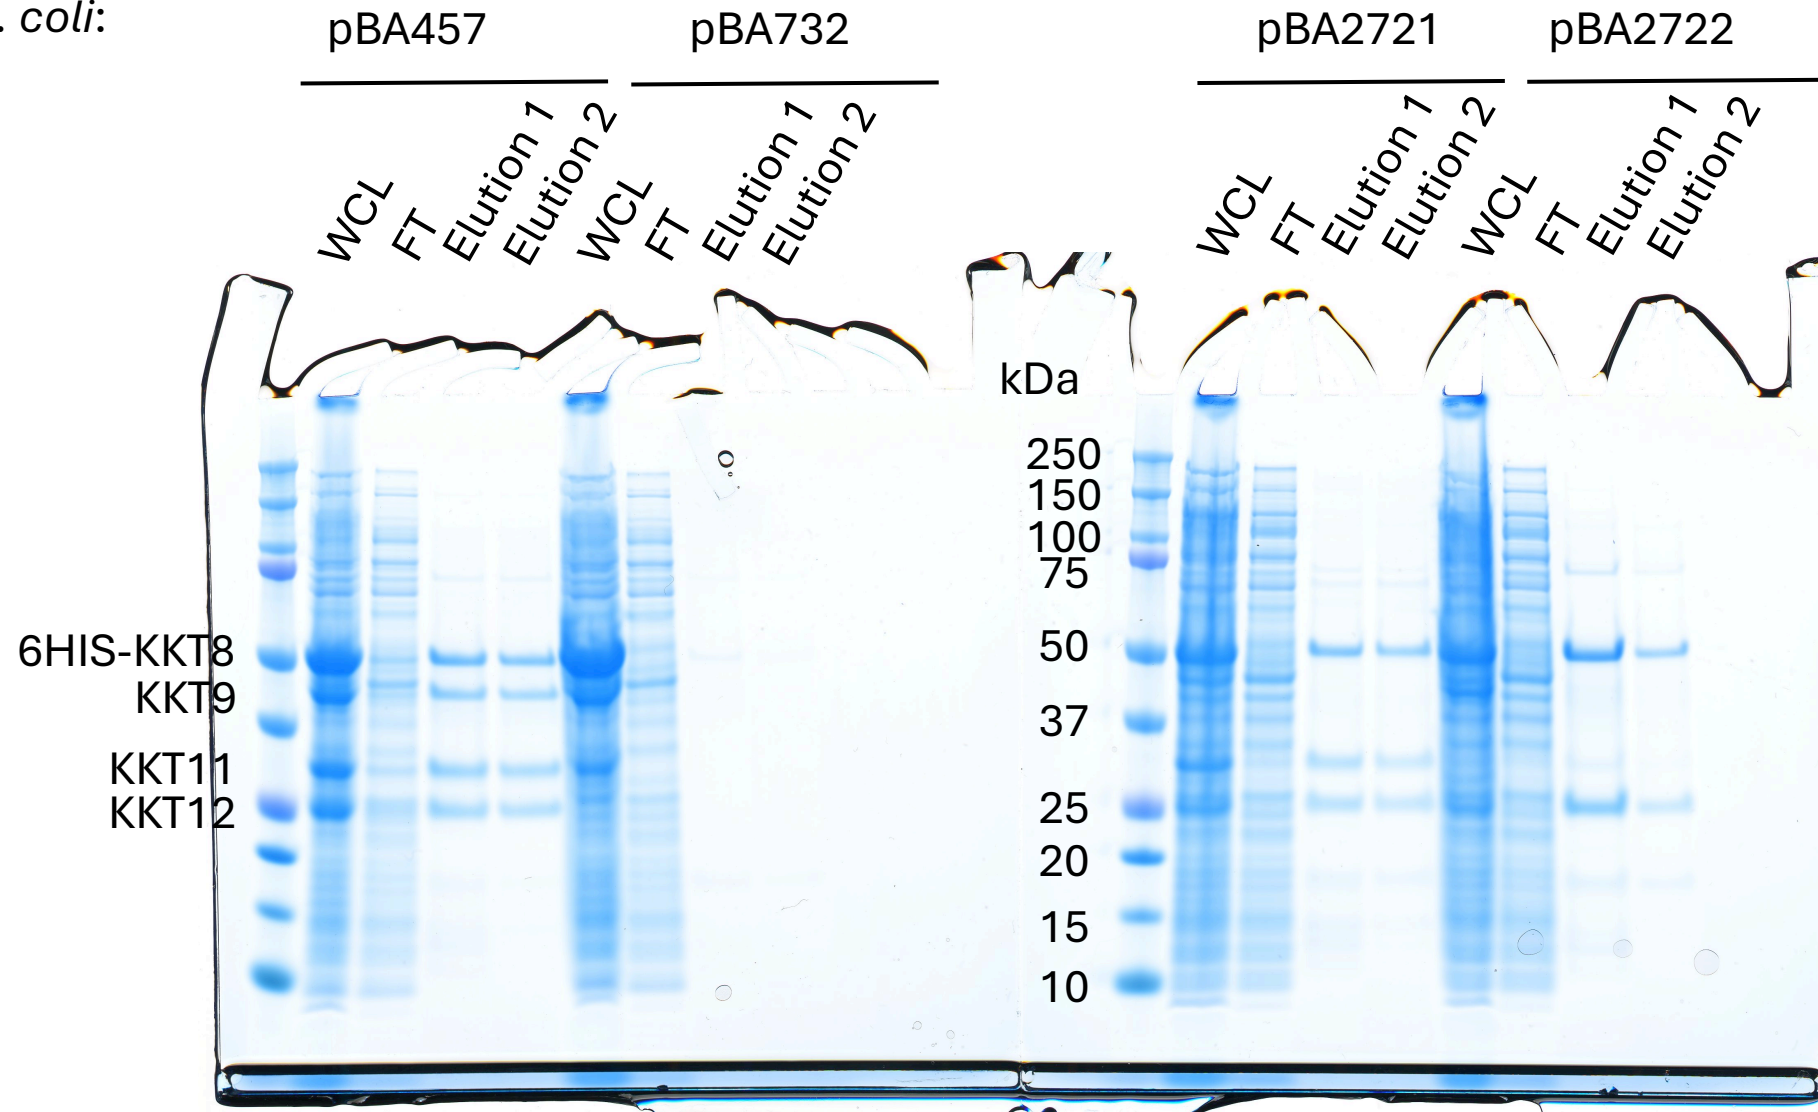

Supplement: fig4-data2 [file elife-93522-fig4-data2-v1.zip]

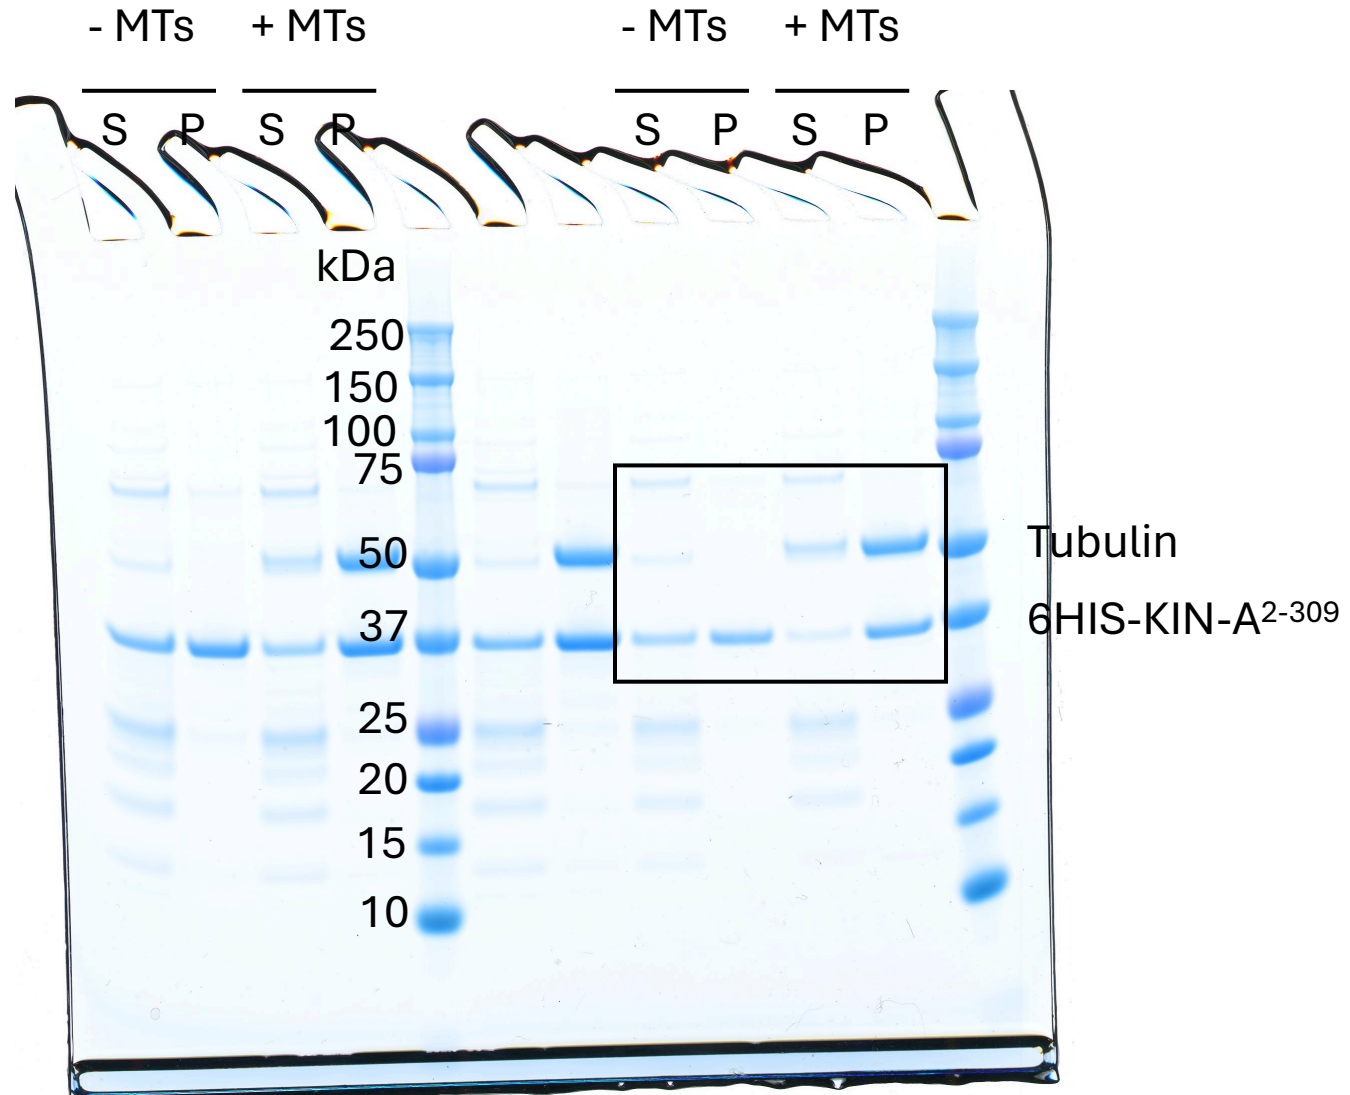

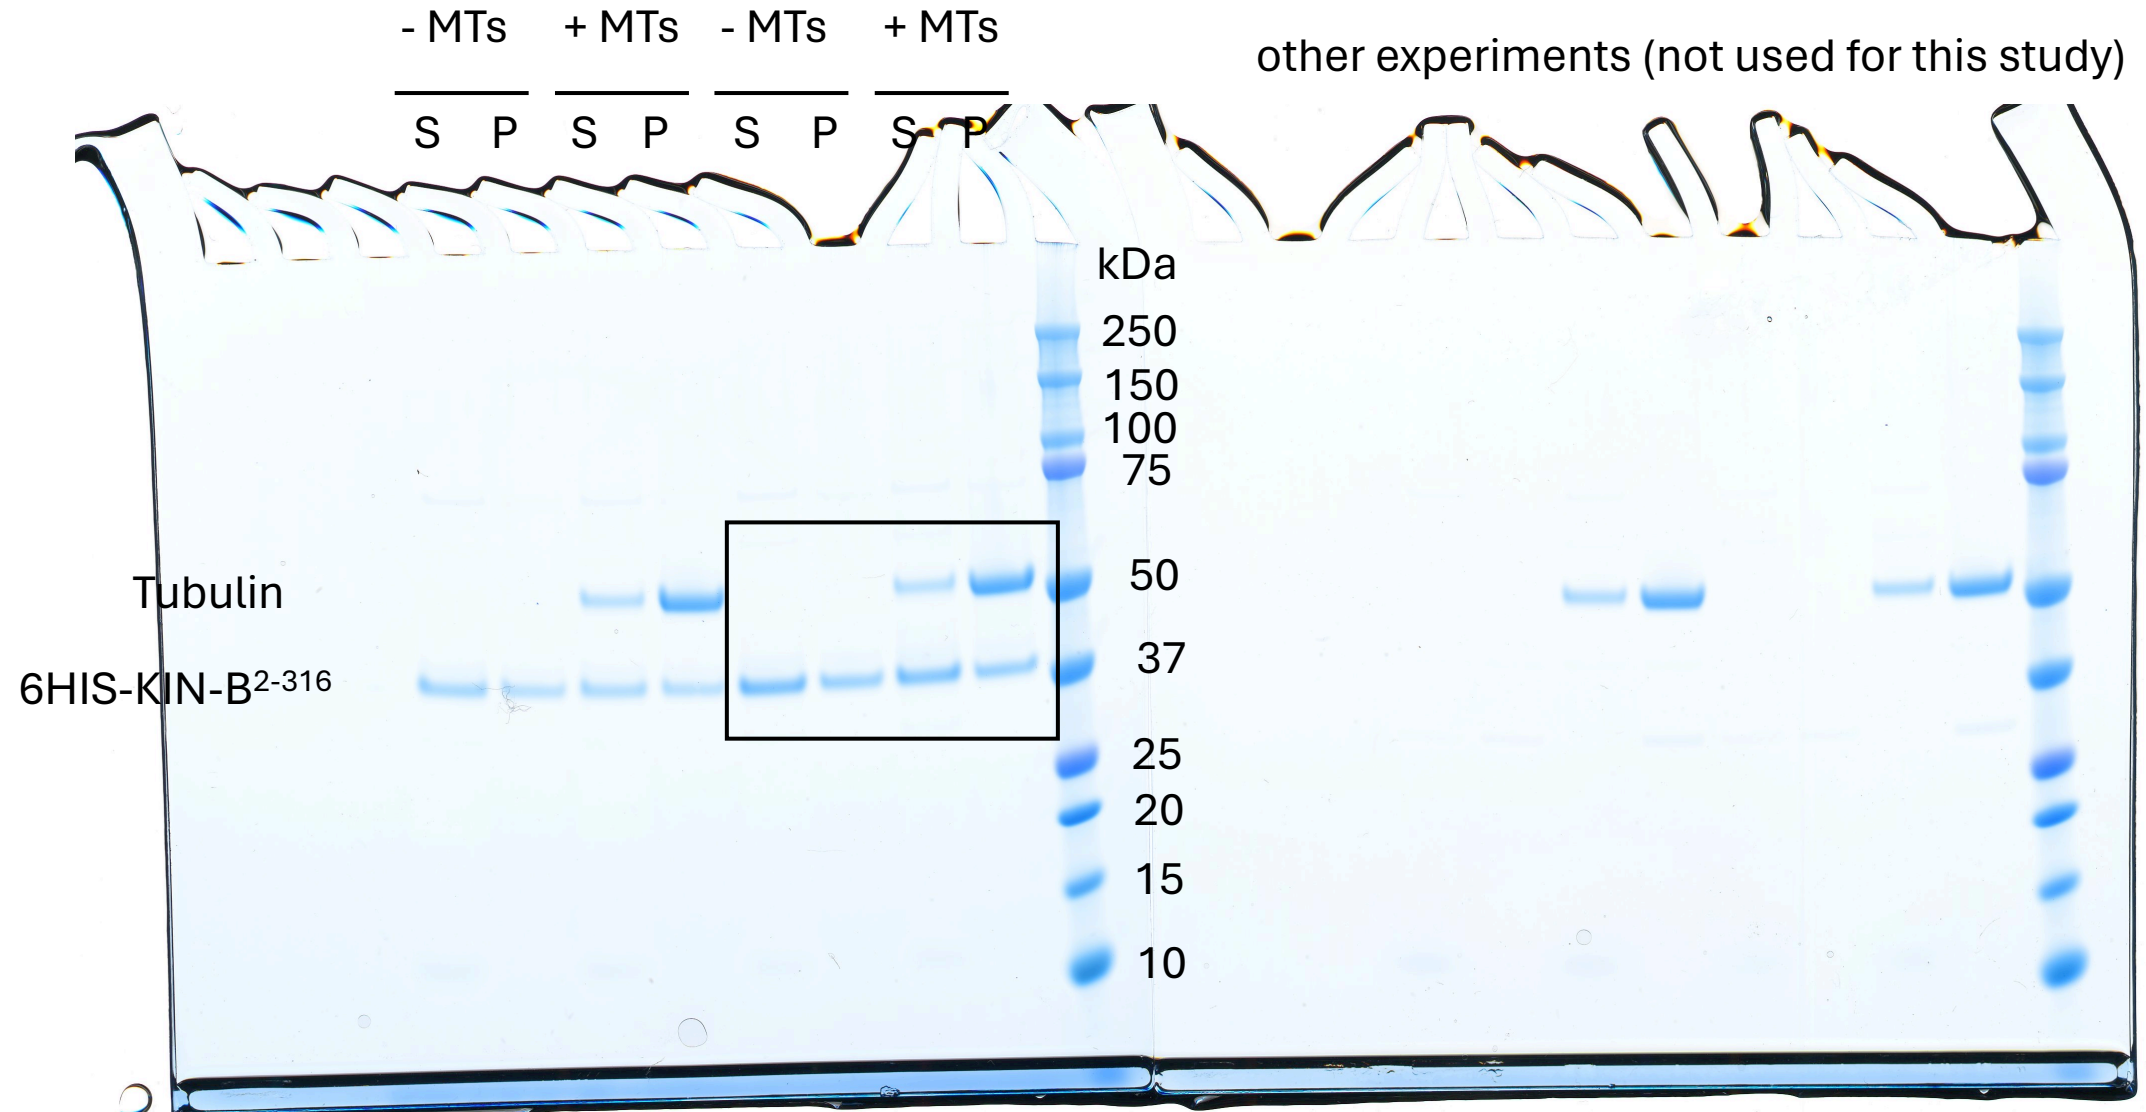

Supplement: fig6-figsupp2-data2 [file elife-93522-fig6-figsupp2-data2-v1.zip]
